# Supplementary material for: PaOctβ2R: Identification and Functional Characterization of an Octopamine Receptor Activating Adenylyl Cyclase Activity in the American Cockroach Periplaneta americana
Source: MDPI journal article supplement (doi:10.3390/ijms23031677), 2022-01-31
Supplement: s1 [file s1]

# PaOct $\beta$ 2R: identification and functional characterization of an octopamine receptor activating adenylyl cyclase activity in the American cockroach *Periplaneta americana*

Wolfgang Blenau, Anna-Sophie Bremer, Yannik Schwietz, Daniel Friedrich, Lapo Ragionieri, Reinhard Predel, Sabine Balfanz and Arnd Baumann

## Supplementary Material

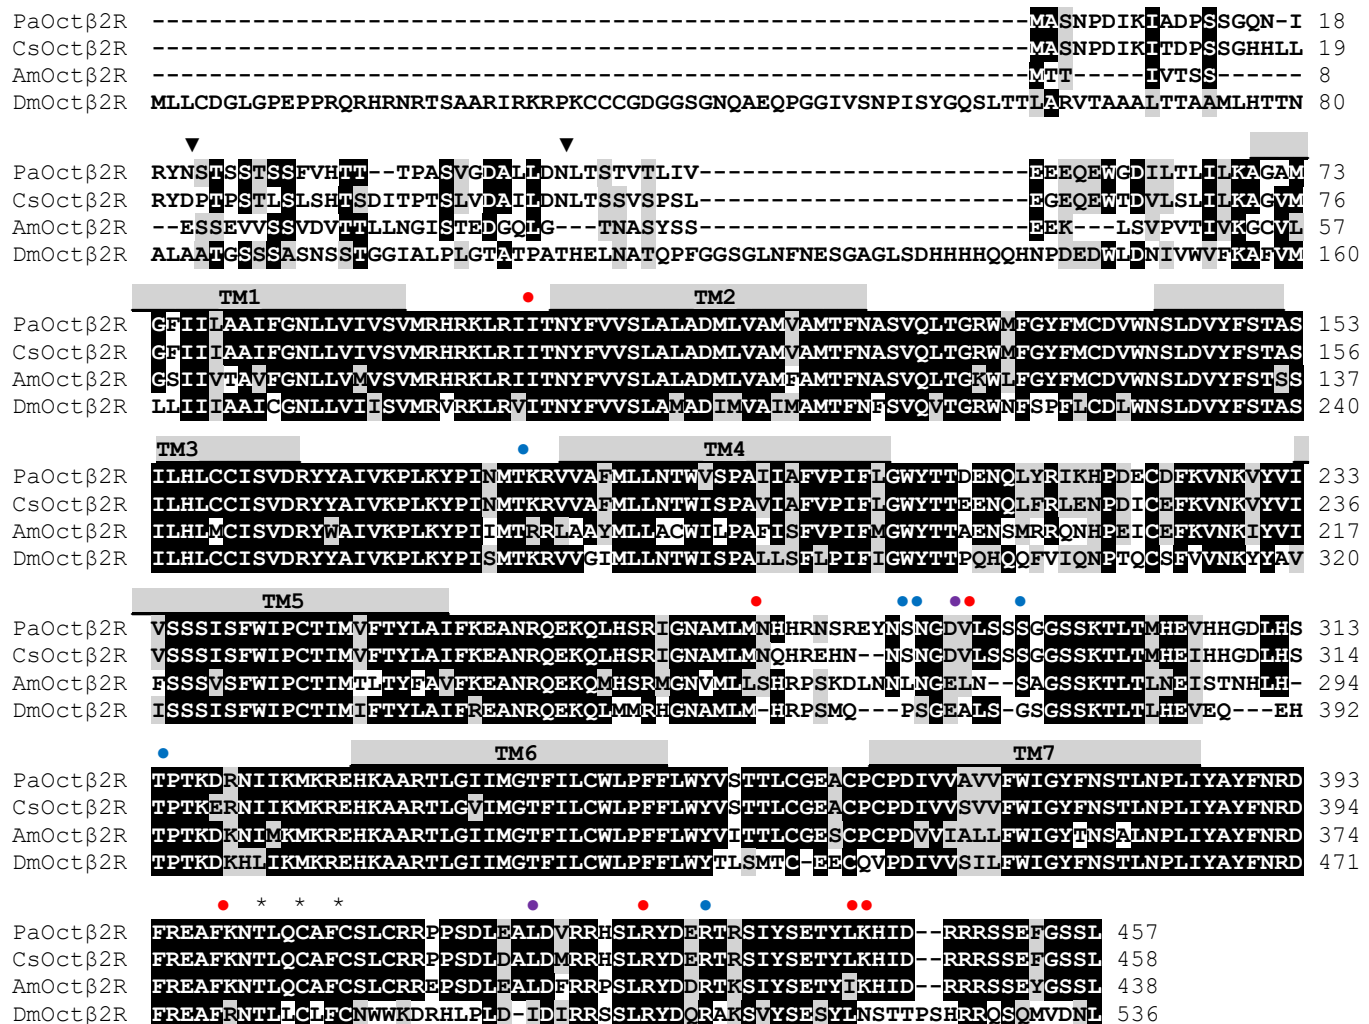

**Figure S1.** Amino acid sequence alignment of PaOct $\beta$ 2R and  $\beta$ <sub>2</sub>-adrenergic-like octopamine receptors from the drywood termite *Cryptotermes secundus* (CsOct $\beta$ 2R; XP\_023721065.1), the honey bee *Apis mellifera* (AmOct $\beta$ 2R; XP\_006558130.1), and the vinegar fly *Drosophila melanogaster* (DmOct $\beta$ 2R; CG33976; NP\_001034049.1). Identical residues ( $\geq 75\%$ ) are shown as white letters against black, whereas conservatively substituted residues are shaded. Grey bars indicate putative transmembrane domains (TM1-7). Potential posttranslational modification sites are labeled: N-glycosylation (▼), protein kinase A (PKA) phosphorylation (●), protein kinase C (PKC) phosphorylation (●), phosphorylation by both PKA and PKC (●). N-glycosylation sites were predicted by NetNGlyc 1.0 Server (<http://www.cbs.dtu.dk/services/NetNGlyc/>). Putative phosphorylation sites were predicted by NetPhos 3.1 Server (<http://www.cbs.dtu.dk/services/NetPhos/>). The amino acid position is given on the right.

Table S1. Accession numbers and annotations of sequences used in the phylogenetic analyses.

| ID                                           | Accession No    | Species                    | Description                                                   | Reference        |
|----------------------------------------------|-----------------|----------------------------|---------------------------------------------------------------|------------------|
| <b>PROTOSTOMIA, Lophotrochozoa, Annelida</b> |                 |                            |                                                               |                  |
| Pd $\alpha$ 1                                | APC23842.1      | <i>P. dumerilii</i>        | $\alpha$ <sub>1</sub> -adrenergic receptor                    | [1]              |
| Pd $\alpha$ 2                                | APC23843.1      | <i>P. dumerilii</i>        | $\alpha$ <sub>2</sub> -adrenergic receptor                    | [1]              |
| PdTAR1                                       | AKQ63052.1      | <i>P. dumerilii</i>        | tyramine receptor 1                                           | [1]              |
| PdTAR2                                       | APC23184.1      | <i>P. dumerilii</i>        | tyramine receptor 2                                           | [1]              |
| PdOct $\alpha$ 1R                            | APC23183.1      | <i>P. dumerilii</i>        | $\alpha$ <sub>1</sub> -adrenergic-like octopamine receptor    | [1]              |
| PdOct $\beta$ R                              | APC23841.1      | <i>P. dumerilii</i>        | $\beta$ -adrenergic-like octopamine receptor                  | [1]              |
| <b>PROTOSTOMIA, Ecdysozoa, Priapulida</b>    |                 |                            |                                                               |                  |
| Pca1                                         | XP_014662992.1  | <i>P. caudatus</i>         | $\alpha$ <sub>1A</sub> -adrenergic receptor-like              |                  |
| Pca2                                         | XP_014681069.1  | <i>P. caudatus</i>         | $\alpha$ <sub>2C</sub> -adrenergic receptor-like              |                  |
| <b>PROTOSTOMIA, Ecdysozoa, Arthropoda</b>    |                 |                            |                                                               |                  |
| PaTAR1A                                      | CAQ48240.1      | <i>P. americana</i>        | tyramine receptor 1A                                          | [2]              |
| PaTAR1B                                      | SNT95699.1      | <i>P. americana</i>        | tyramine receptor 1B                                          | [3]              |
| PaTAR2                                       | OL739162        | <i>P. americana</i>        | tyramine receptor 2                                           | This work        |
| PaOct $\alpha$ 1R                            | AAP93817.1      | <i>P. americana</i>        | $\alpha$ <sub>1</sub> -adrenergic-like octopamine receptor    | [4]              |
| PaOct $\alpha$ 2R                            | OL904962        | <i>P. americana</i>        | $\alpha$ <sub>2</sub> -adrenergic-like octopamine receptor    | This work        |
| PaOct $\beta$ 1R fragment                    | OL739163        | <i>P. americana</i>        | $\beta$ -adrenergic-like octopamine receptor                  | This work        |
| <b>PaOct<math>\beta</math>2R</b>             | <b>OL739164</b> | <b><i>P. americana</i></b> | <b><math>\beta</math>-adrenergic-like octopamine receptor</b> | <b>This work</b> |
| PaOct $\beta$ 3R fragment                    | OL739165        | <i>P. americana</i>        | $\beta$ -adrenergic-like octopamine receptor                  | This work        |
| PaDOP1                                       | OL770093        | <i>P. americana</i>        | D <sub>1</sub> -like dopamine receptor                        | This work        |
| PaDOP2A                                      | CDK37789.1      | <i>P. americana</i>        | invertebrate-type dopamine receptor, isoform A                | [5]              |
| PaDOP3                                       | OL739166        | <i>P. americana</i>        | D <sub>2</sub> -like dopamine receptor                        | This work        |
| PaDOPEcR                                     | OL739167        | <i>P. americana</i>        | dopamine/ecdyteroid receptor                                  | This work        |
| Pa5-HT1                                      | CAX65666.1      | <i>P. americana</i>        | 5-HT <sub>1</sub> -like serotonin receptor                    | [6]              |
| Pa5-HT2 $\alpha$                             | OL739168        | <i>P. americana</i>        | 5-HT <sub>2</sub> -like serotonin receptor                    | This work        |
| Pa5-HT2 $\beta$                              | OL739169        | <i>P. americana</i>        | 5-HT <sub>2</sub> -like serotonin receptor                    | This work        |
| Pa5-HT7                                      | OL739170        | <i>P. americana</i>        | 5-HT <sub>7</sub> -like serotonin receptor                    | This work        |
| Pa18                                         | OL739171        | <i>P. americana</i>        | orphan                                                        | This work        |
| PaBAR X                                      | OL739172        | <i>P. americana</i>        | orphan                                                        | This work        |
| AmTAR1                                       | NP_001011594.1  | <i>A. mellifera</i>        | tyramine receptor 1                                           | [7]              |
| AmTAR2                                       | APL96716.1      | <i>A. mellifera</i>        | tyramine receptor 2                                           | [8]              |
| AmOct $\alpha$ 1R                            | NP_001011565.1  | <i>A. mellifera</i>        | $\alpha$ <sub>1</sub> -adrenergic-like octopamine receptor    | [9]              |
| AmOct $\alpha$ 2R                            | XP_001122075.3  | <i>A. mellifera</i>        | $\alpha$ <sub>2</sub> -adrenergic-like octopamine receptor    | [10]             |
| AmOct $\beta$ 1R                             | CCO13922.1      | <i>A. mellifera</i>        | $\beta$ -adrenergic-like octopamine receptor 1                | [11]             |
| AmOct $\beta$ 2R                             | CCO13923.1      | <i>A. mellifera</i>        | $\beta$ -adrenergic-like octopamine                           | [11]             |

|                                                |                |                        |                                                                                 |          |
|------------------------------------------------|----------------|------------------------|---------------------------------------------------------------------------------|----------|
| AmOct $\beta$ 3R                               | CCO13924.1     | <i>A. mellifera</i>    | receptor 2<br>$\beta$ -adrenergic-like octopamine receptor 3                    | [11]     |
| AmOct $\beta$ 4R                               | CCO13925.1     | <i>A. mellifera</i>    | $\beta$ -adrenergic-like octopamine receptor 4                                  | [11]     |
| AmDOP1                                         | NP_001011595.1 | <i>A. mellifera</i>    | D <sub>1</sub> -like dopamine receptor                                          | [12]     |
| AmDOP2                                         | NP_001011567.1 | <i>A. mellifera</i>    | invertebrate-type dopamine receptor                                             | [13, 14] |
| AmDOP3                                         | NP_001014983.1 | <i>A. mellifera</i>    | D <sub>2</sub> -like dopamine receptor                                          | [15]     |
| AmDopEcR                                       | XP_016768310.1 | <i>A. mellifera</i>    | dopamine/ecdyteroid receptor                                                    |          |
| Am5-HT1A                                       | CBI75449.1     | <i>A. mellifera</i>    | 5-HT <sub>1</sub> -like serotonin receptor                                      | [16]     |
| Am5-HT2 $\alpha$                               | CBX90120.1     | <i>A. mellifera</i>    | 5-HT <sub>2</sub> -like serotonin receptor                                      | [17]     |
| Am5-HT2 $\beta$                                | CBX90121.1     | <i>A. mellifera</i>    | 5-HT <sub>2</sub> -like serotonin receptor                                      | [17]     |
| Am5-HT7                                        | CAJ28210.1     | <i>A. mellifera</i>    | 5-HT <sub>7</sub> -like serotonin receptor                                      | [18]     |
| Am18                                           | XP_026297873   | <i>A. mellifera</i>    | orphan                                                                          |          |
| DmTAR1                                         | NP_524419.2    | <i>D. melanogaster</i> | tyramine receptor 1<br>(octopamine-tyramine receptor)                           | [19]     |
| DmTAR2                                         | NP_650652.1    | <i>D. melanogaster</i> | tyramine receptor 2                                                             | [20]     |
| DmTAR3                                         | NP_650651.1    | <i>D. melanogaster</i> | tyramine receptor 3                                                             | [20, 21] |
| DmOct $\alpha$ 1AR                             | CAB38026.1     | <i>D. melanogaster</i> | $\alpha$ <sub>1</sub> -adrenergic-like octopamine receptor 1, splice variant 1A | [22]     |
| DmOct $\alpha$ 1BR                             | CAB38025.1     | <i>D. melanogaster</i> | $\alpha$ <sub>1</sub> -adrenergic-like octopamine receptor 1, splice variant 1B | [22]     |
| DmOct $\alpha$ 2R                              | NP_650754.2    | <i>D. melanogaster</i> | $\alpha$ <sub>2</sub> -adrenergic-like octopamine receptor                      | [23]     |
| DmOct $\beta$ 1R                               | NP_651057.1    | <i>D. melanogaster</i> | $\beta$ -adrenergic-like octopamine receptor 1                                  | [22, 24] |
| DmOct $\beta$ 2R                               | NP_001034049.1 | <i>D. melanogaster</i> | $\beta$ -adrenergic-like octopamine receptor 2                                  | [24]     |
| DmOct $\beta$ 3R                               | NP_001034043.2 | <i>D. melanogaster</i> | $\beta$ -adrenergic-like octopamine receptor 2                                  | [24]     |
| DmDOP1                                         | CAA54451.1     | <i>D. melanogaster</i> | D <sub>1</sub> -like dopamine receptor                                          | [25]     |
| DmDOP2                                         | NP_733299.1    | <i>D. melanogaster</i> | invertebrate-type dopamine receptor                                             | [26]     |
| DmDOP3                                         | AAX52464.2     | <i>D. melanogaster</i> | D <sub>2</sub> -like dopamine receptor                                          | [27]     |
| DmDOPEcR                                       | NP_001014559.1 | <i>D. melanogaster</i> | dopamine/ecdyteroid receptor                                                    | [28]     |
| Dm5-HT1A                                       | CAA77570.1     | <i>D. melanogaster</i> | 5-HT <sub>1</sub> -like serotonin receptor                                      | [29]     |
| Dm5-HT1B                                       | CAA77571.1     | <i>D. melanogaster</i> | 5-HT <sub>1</sub> -like serotonin receptor                                      | [29]     |
| Dm5-HT2 $\alpha$                               | NP_524223.2    | <i>D. melanogaster</i> | 5-HT <sub>2</sub> -like serotonin receptor                                      | [30]     |
| Dm5-HT2 $\beta$                                | NP_001262373.1 | <i>D. melanogaster</i> | 5-HT <sub>2</sub> -like serotonin receptor                                      | [31]     |
| Dm5-HT7                                        | NP_524599.1    | <i>D. melanogaster</i> | 5-HT <sub>7</sub> -like serotonin receptor                                      | [32]     |
| DmCG13579                                      | NP_611917.2    | <i>D. melanogaster</i> | orphan                                                                          |          |
| <b>DEUTEROSTOMIA, Ambulacraria, Priapulida</b> |                |                        |                                                                                 |          |
| Ska1                                           | ALR88680.1     | <i>S. kowalevskii</i>  | $\alpha$ <sub>1</sub> -adrenergic receptor-like 067                             | [33]     |
| Ska2                                           | XP_002734932.1 | <i>S. kowalevskii</i>  | $\alpha$ <sub>2c</sub> -adrenergic receptor-like                                |          |
| SkTAR1                                         | XP_002742354.2 | <i>S. kowalevskii</i>  | tyramine receptor 1                                                             |          |
| SkTAR2A                                        | XP_002734062.1 | <i>S. kowalevskii</i>  | tyramine receptor 2A                                                            |          |
| SkTAR2B                                        | XP_006812999.1 | <i>S. kowalevskii</i>  | tyramine receptor 2B                                                            |          |
| SkOct $\alpha$ 1R                              | XP_006823182.1 | <i>S. kowalevskii</i>  | $\alpha$ <sub>1</sub> -adrenergic-like octopamine receptor                      |          |
| SkOct $\beta$ R                                | XP_002733926.1 | <i>S. kowalevskii</i>  | $\beta$ -adrenergic-like octopamine receptor                                    |          |

DEUTEROSTOMIA, Chordata, Vertebrata

|          |             |                   |                                                              |      |
|----------|-------------|-------------------|--------------------------------------------------------------|------|
| Hsα1A    | NP_000671.2 | <i>H. sapiens</i> | α <sub>1A</sub> -adrenergic receptor                         | [34] |
| Hsα1B    | NP_000670.1 | <i>H. sapiens</i> | α <sub>1B</sub> -adrenergic receptor                         | [35] |
| Hsα1D    | NP_000669.1 | <i>H. sapiens</i> | α <sub>1D</sub> -adrenergic receptor                         | [36] |
| Hsα2A    | NP_000672.3 | <i>H. sapiens</i> | α <sub>2A</sub> -adrenergic receptor                         | [37] |
| Hsα2B    | NP_000673.2 | <i>H. sapiens</i> | α <sub>2B</sub> -adrenergic receptor                         | [38] |
| Hsα2C    | NP_000674.2 | <i>H. sapiens</i> | α <sub>2C</sub> -adrenergic receptor                         | [39] |
| Hsβ1     | NP_000675.1 | <i>H. sapiens</i> | β <sub>1</sub> -adrenergic receptor                          | [40] |
| Hsβ2     | NP_000015.1 | <i>H. sapiens</i> | β <sub>2</sub> -adrenergic receptor                          | [41] |
| Hsβ3     | NP_000016.1 | <i>H. sapiens</i> | β <sub>3</sub> -adrenergic receptor                          | [42] |
| HsD1A    | NP_000785.1 | <i>H. sapiens</i> | D <sub>1A</sub> dopamine receptor                            | [43] |
| HsD1B    | NP_000789.1 | <i>H. sapiens</i> | D <sub>1B</sub> dopamine receptor                            | [44] |
| HsD2     | NP_000786.1 | <i>H. sapiens</i> | D <sub>2</sub> dopamine receptor isoform long                | [45] |
| HsD3     | NP_000787.2 | <i>H. sapiens</i> | D <sub>3</sub> dopamine receptor isoform a                   | [46] |
| HsD4     | NP_000788.2 | <i>H. sapiens</i> | D <sub>4</sub> dopamine receptor                             | [47] |
| Hs5-HT1A | NP_000515.2 | <i>H. sapiens</i> | 5-HT <sub>1A</sub> serotonin receptor                        | [48] |
| Hs5-HT1B | NP_000854.1 | <i>H. sapiens</i> | 5-HT <sub>1B</sub> serotonin receptor                        | [49] |
| Hs5-HT1D | NP_000855.1 | <i>H. sapiens</i> | 5-HT <sub>1D</sub> serotonin receptor                        | [50] |
| Hs5-HT1E | NP_000856.1 | <i>H. sapiens</i> | 5-HT <sub>1E</sub> serotonin receptor                        | [51] |
| Hs5-HT1F | NP_000857.1 | <i>H. sapiens</i> | 5-HT <sub>1F</sub> serotonin receptor                        | [52] |
| Hs5-HT2A | NP_000612.1 | <i>H. sapiens</i> | 5-HT <sub>2A</sub> serotonin receptor isoform 1              | [53] |
| Hs5-HT2B | NP_000858.3 | <i>H. sapiens</i> | 5-HT <sub>2B</sub> serotonin receptor isoform 1              | [54] |
| Hs5-HT2C | NP_000859.1 | <i>H. sapiens</i> | 5-HT <sub>2C</sub> serotonin receptor 2C isoform a precursor | [53] |
| Hs5-HT7  | NP_000863.1 | <i>H. sapiens</i> | 5-HT <sub>7</sub> serotonin receptor isoform a               | [55] |
| HsRHOD   | AAC31763.1  | <i>H. sapiens</i> | rhodopsin                                                    | [56] |

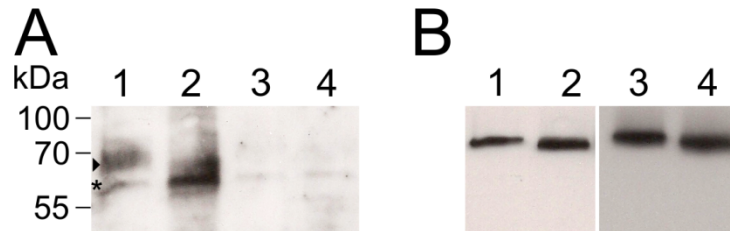

**Figure S2. Expression of PaOctβ2R-HA in flpTM cells.** **A)** Western blot of membrane proteins (30 μg) from flpTM + PaOctβ2R-HA expressing (lane 1, 2) and flpTM cells (lane 3, 4) were not treated (lane 1, 3) or treated with PNGase F (lane 2, 4). Proteins were separated by sodium dodecyl sulfate-polyacrylamide gel electrophoresis (SDS-PAGE) and blotted to a polyvinylidene difluoride (PVDF) membrane. The blot was probed with a rat anti-HA antibody (dilution 1:1,000). A secondary HRP-coupled donkey-anti-rat antibody (dilution 1:5,000) was used for detection. Bands were visualized with ECL. **B)** The same blot was subsequently probed with an antibody directed against the C-terminus of the CNG channel (dilution 1:500). A secondary HRP-coupled rabbit-anti-mouse antibody (dilution 1:80,000) was used for detection. Note that exposure times in **(B)** were 1 min (lanes 1, 2) and 2 s (lanes 3, 4). The sizes of marker proteins in kDa are given on the left margin.

**Table S2. Detection of biogenic amine receptor sequences in transcriptomes of various cockroach tissues.**

| Receptor          | CNS | Frontal ganglion | Corpora cardiaca | Heart | Leg muscle | Midgut |
|-------------------|-----|------------------|------------------|-------|------------|--------|
| PaTAR1A           | +   | +                | +                | +     | +          | -      |
| PaTAR1B           | -   | +                | +                | -     | -          | -      |
| PaTAR2            | +   | +                | +                | +     | -          | +      |
| PaOct $\alpha$ 1R | +   | +                | +                | +     | +          | +      |
| PaOct $\alpha$ 2R | -   | +                | +                | -     | -          | -      |
| PaOct $\beta$ 1R  | -   | +                | +                | -     | -          | -      |
| PaOct $\beta$ 2R  | +   | +                | +                | +     | +          | -      |
| PaOct $\beta$ 3R  | -   | +                | +                | -     | -          | -      |
| PaDOP1            | -   | +                | +                | -     | -          | -      |
| PaDOP2            | +   | -                | -                | -     | -          | -      |
| PaDOP3            | -   | +                | +                | -     | -          | -      |
| PaDOPEcR          | +   | +                | +                | +     | -          | -      |
| Pa5-HT1           | +   | +                | +                | -     | -          | +      |
| Pa5-HT2 $\alpha$  | +   | +                | +                | +     | -          | +      |
| Pa5-HT2 $\beta$   | +   | +                | +                | +     | -          | -      |
| Pa5-HT7           | +   | +                | +                | +     | -          | +      |
| Pa18              | +   | +                | +                | -     | -          | -      |
| PaBAR X           | +   | +                | +                | +     | -          | -      |

## References

1. Bauknecht, P.; Jékely, G. Ancient coexistence of norepinephrine, tyramine, and octopamine signaling in bilaterians. *BMC Biol.* **2017**, *15*, 6.
2. Rotte, C.; Krach, C.; Balfanz, S.; Baumann, A.; Walz, B.; Blenau, W. Molecular characterization and localization of the first tyramine receptor of the American cockroach (*Periplaneta americana*). *Neuroscience* **2009**, *162*, 1120-1133.
3. Blenau, W.; Balfanz, S.; Baumann, A. PaTAR1B: Characterization of a second type 1 tyramine receptor of the American cockroach, *Periplaneta americana*. *Int. J. Mol. Sci.* **2017**, *18*, 2279.
4. Bischof, L.J.; Enan, E.E. Cloning, expression and functional analysis of an octopamine receptor from *Periplaneta americana*. *Insect Biochem. Mol. Biol.* **2004**, *34*, 511-521.
5. Troppmann, B.; Balfanz, S.; Krach, C.; Baumann, A.; Blenau, W. Characterization of an invertebrate-type dopamine receptor of the American cockroach, *Periplaneta americana*. *Int. J. Mol. Sci.* **2014**, *15*, 629-653.
6. Troppmann, B.; Balfanz, S.; Baumann, A.; Blenau, W. Inverse agonist and neutral antagonist actions of synthetic compounds at an insect 5-HT<sub>1</sub> receptor. *Br. J. Pharmacol.* **2010**, *159*, 1450-1562.
7. Blenau, W.; Balfanz, S.; Baumann, A. Amtyr1: characterization of a gene from honeybee (*Apis mellifera*) brain encoding a functional tyramine receptor. *J. Neurochem.* **2000**, *74*, 900-908.
8. Reim, T.; Balfanz, S.; Baumann, A.; Blenau, W.; Thamm, M.; Scheiner, R. AmTAR2: Functional characterization of a honeybee tyramine receptor stimulating adenylyl cyclase activity. *Insect Biochem. Mol. Biol.* **2017**, *80*, 91-100.
9. Grohmann, L.; Blenau, W.; Erber, J.; Ebert, P.R.; Strünker, T.; Baumann, A. Molecular and functional characterization of an octopamine receptor from honeybee (*Apis mellifera*) brain. *J. Neurochem.* **2003**, *86*, 725-735.
10. Blenau, W.; Wilms, J.A.; Balfanz, S.; Baumann, A. AmOct $\alpha$ 2R: functional characterization of a honeybee octopamine receptor inhibiting adenylyl cyclase activity. *Int. J. Mol. Sci.* **2020**, *21*, 9334.
11. Balfanz, S.; Jordan, N.; Langenstück, T.; Breuer, J.; Bergmeier, V.; Baumann, A. Molecular, pharmacological, and signaling properties of octopamine receptors from honeybee (*Apis mellifera*) brain. *J. Neurochem.* **2014**, *129*, 284-296.
12. Blenau, W.; Erber, J.; Baumann, A. Characterization of a dopamine D<sub>1</sub> receptor from *Apis mellifera*: cloning, functional expression, pharmacology, and mRNA localization in the brain. *J. Neurochem.* **1998**, *70*, 15-23.
13. Humphries, M.A.; Mustard, J.A.; Hunter, S.J.; Mercer, A.; Ward, V.; Ebert, P.R. Invertebrate D<sub>2</sub> type dopamine receptor exhibits age-based plasticity of expression in the mushroom bodies of the honeybee brain. *J. Neurobiol.* **2003**, *55*, 315-330.
14. Mustard, J.A.; Blenau, W.; Hamilton, I.S.; Ward, V.K.; Ebert, P.R.; Mercer, A.R. Analysis of two D<sub>1</sub>-like dopamine receptors from the honey bee *Apis mellifera* reveals agonist-independent activity. *Brain Res. Mol. Brain Res.* **2003**, *113*, 67-77.

15. Beggs, K.T.; Hamilton, I.S.; Kurshan, P.T.; Mustard, J.A.; Mercer, A.R. Characterization of a D2-like dopamine receptor (AmDOP3) in honey bee, *Apis mellifera*. *Insect Biochem. Mol. Biol.* **2005**, *35*, 873-882.
16. Thamm, M.; Balfanz, S.; Scheiner, R.; Baumann, A.; Blenau, W. Characterization of the 5-HT<sub>1A</sub> receptor of the honeybee (*Apis mellifera*) and involvement of serotonin in phototactic behavior. *Cell. Mol. Life Sci.* **2010**, *67*, 2467-2479.
17. Thamm, M.; Rolke, D.; Jordan, N.; Balfanz, S.; Schiffer, C.; Baumann, A.; Blenau, W. Function and distribution of 5-HT<sub>2</sub> receptors in the honeybee (*Apis mellifera*). *PLoS One* **2013**, *8*, e82407.
18. Schlenstedt, J.; Balfanz, S.; Baumann, A.; Blenau, W. Am5-HT<sub>7</sub>: molecular and pharmacological characterization of the first serotonin receptor of the honeybee (*Apis mellifera*). *J. Neurochem.* **2006**, *98*, 1985-1998.
19. Saudou, F.; Amlaiky, N.; Plassat, J.L.; Borrelli, E.; Hen, R. Cloning and characterization of a *Drosophila* tyramine receptor. *EMBO J.* **1990**, *9*, 3611-3617.
20. Cazzamali, G.; Klaerke, D.A.; Grimmelikhuijzen, C.J. A new family of insect tyramine receptors. *Biochem. Biophys. Res. Commun.* **2005**, *338*, 1189-1196.
21. Bayliss, A.; Roselli, G.; Evans, P.D. A comparison of the signalling properties of two tyramine receptors from *Drosophila*. *J. Neurochem.* **2013**, *125*, 37-48.
22. Balfanz, S.; Strünker, T.; Frings, S.; Baumann, A. A family of octopamine receptors that specifically induce cyclic AMP production or Ca<sup>2+</sup> release in *Drosophila melanogaster*. *J. Neurochem.* **2005**, *93*, 440-451.
23. Qi, Y.X.; Xu, G.; Gu, G.X.; Mao, F.; Ye, G.Y.; Liu, W.; Huang, J. A new *Drosophila* octopamine receptor responds to serotonin. *Insect Biochem. Mol. Biol.* **2017**, *90*, 61-70.
24. Maqueira, B.; Chatwin, H.; Evans, P.D. Identification and characterization of a novel family of *Drosophila*  $\beta$ -adrenergic-like octopamine G-protein coupled receptors. *J. Neurochem.* **2005**, *94*, 547-560.
25. Gotzes, F.; Balfanz, S.; Baumann, A. Primary structure and functional characterization of a *Drosophila* dopamine receptor with high homology to human D<sub>1/5</sub> receptors. *Receptors Channels* **1994**, *2*, 131-141.
26. Feng, G.; Hannan, F.; Reale, V.; Hon, Y.Y.; Kousky, C.T.; Evans, P.D.; Hall, L.M. Cloning and functional characterization of a novel dopamine receptor from *Drosophila melanogaster*. *J. Neurosci.* **1996**, *16*, 3925-3933.
27. Hearn, M.G.; Ren, Y.; McBride, E.W.; Reveillaud, I.; Beinborn, M.; Kopin, A.S. A *Drosophila* dopamine 2-like receptor: Molecular characterization and identification of multiple alternatively spliced variants. *Proc. Natl. Acad. Sci. U. S. A.* **2002**, *99*, 14554-14559.
28. Srivastava, D.P.; Yu, E.J.; Kennedy, K.; Chatwin, H.; Reale, V.; Hamon, M.; Smith, T.; Evans, P.D. Rapid, nongenomic responses to ecdysteroids and catecholamines mediated by a novel *Drosophila* G-protein-coupled receptor. *J. Neurosci.* **2005**, *25*, 6145-6155.
29. Saudou, F.; Boschert, U.; Amlaiky, N.; Plassat, J.L.; Hen, R. A family of *Drosophila* serotonin receptors with distinct intracellular signalling properties and expression patterns. *EMBO J.* **1992**, *11*, 7-17.
30. Colas, J.F.; Launay, J.M.; Kellermann, O.; Rosay, P.; Maroteaux, L. *Drosophila* 5-HT<sub>2</sub> serotonin receptor: coexpression with fushi-tarazu during segmentation. *Proc. Natl. Acad. Sci. U. S. A.* **1995**, *92*, 5441-5445.
31. Blenau, W.; Stöppler, D.; Balfanz, S.; Thamm, M.; Baumann, A. Dm5-HT<sub>2B</sub>: pharmacological characterization of the fifth serotonin receptor subtype of *Drosophila melanogaster*. *Front. Syst. Neurosci.* **2017**, *11*, 28.
32. Witz, P.; Amlaiky, N.; Plassat, J.L.; Maroteaux, L.; Borrelli, E.; Hen, R. Cloning and characterization of a *Drosophila* serotonin receptor that activates adenylate cyclase. *Proc. Natl. Acad. Sci. U. S. A.* **1990**, *87*, 8940-8944.
33. Simakov, O.; Kawashima, T.; Marlétaz, F.; Jenkins, J.; Koyanagi, R.; Mitros, T.; Hisata, K.; Bredeson, J.; Shoguchi, E.; Gyoja, F.; Yue, J.X.; Chen, Y.C.; Freeman, R.M. Jr.; Sasaki, A.; Hikosaka-Katayama, T.; Sato, A.; Fujie, M.; Baughman, K.W.; Levine, J.; Gonzalez, P.; Cameron, C.; Fritzenwanker, J.H.; Pani, A.M.; Goto, H.; Kanda, M.; Arakaki, N.; Yamasaki, S.; Qu, J.; Cree, A.; Ding, Y.; Dinh, H.H.; Dugan, S.; Holder, M.; Jhangiani, S.N.; Kovar, C.L.; Lee, S.L.; Lewis, L.R.; Morton, D.; Nazareth, L.V.; Okwuonu, G.; Santibanez, J.; Chen, R.; Richards, S.; Muzny, D.M.; Gillis, A.; Peshkin, L.; Wu, M.; Humphreys, T.; Su, Y.H.; Putnam, N.H.; Schmutz, J.; Fujiyama, A.; Yu, J.K.; Tagawa, K.; Worley, K.C.; Gibbs, R.A.; Kirschner, M.W.; Lowe, C.J.; Satoh, N.; Rokhsar, D.S.; Gerhart, J. Hemichordate genomes and deuterostome origins. *Nature* **2015**, *527*, 459-465.
34. Schwinn, D.A.; Lomasney, J.W.; Lorenz, W.; Szklut, P.J.; Fremeau, R.T. Jr.; Yang-Feng, T.L.; Caron, M.G.; Lefkowitz, R.J.; Cotecchia, S. Molecular cloning and expression of the cDNA for a novel  $\alpha_{1B}$ -adrenergic receptor subtype. *J. Biol. Chem.* **1990**, *265*, 8183-8189.
35. Allen, L.F.; Lefkowitz, R.J.; Caron, M.G.; Cotecchia, S. G-protein-coupled receptor genes as protooncogenes: constitutively activating mutation of the  $\alpha_{1B}$ -adrenergic receptor enhances mitogenesis and tumorigenicity. *Proc. Natl. Acad. Sci. U. S. A.* **1991**, *88*, 11354-11358.
36. Bruno, J.F.; Whittaker, J.; Song, J.F.; Berelowitz, M. Molecular cloning and sequencing of a cDNA encoding a human  $\alpha_{1A}$  adrenergic receptor. *Biochem. Biophys. Res. Commun.* **1991**, *179*, 1485-1490.
37. Kobilka, B.K.; Matsui, H.; Kobilka, T.S.; Yang-Feng, T.L.; Francke, U.; Caron, M.G.; Lefkowitz, R.J.; Regan, J.W. Cloning, sequencing, and expression of the gene coding for the human platelet  $\alpha_2$ -adrenergic receptor. *Science* **1987**, *238*, 650-656.

38. Lomasney, J.W.; Lorenz, W.; Allen, L.F.; King, K.; Regan, J.W.; Yang-Feng, T.L.; Caron, M.G.; Lefkowitz, R.J. Expansion of the  $\alpha_2$ -adrenergic receptor family: cloning and characterization of a human  $\alpha_2$ -adrenergic receptor subtype, the gene for which is located on chromosome 2. *Proc. Natl. Acad. Sci. U. S. A.* **1990**, *87*, 5094-5098.
39. Regan, J.W.; Kobilka, T.S.; Yang-Feng, T.L.; Caron, M.G.; Lefkowitz, R.J.; Kobilka, B.K. Cloning and expression of a human kidney cDNA for an  $\alpha_2$ -adrenergic receptor subtype. *Proc. Natl. Acad. Sci. U. S. A.* **1988**, *85*, 6301-6305.
40. Frielle, T.; Collins, S.; Daniel, K.W.; Caron, M.G.; Lefkowitz, R.J.; Kobilka, B. K. Cloning of the cDNA for the human  $\beta_1$ -adrenergic receptor. *Proc. Natl. Acad. Sci. U. S. A.* **1987**, *84*, 7920-7924.
41. Emorine, L.J.; Marullo, S.; Delavie-Klutcho, C.; Kaveri, S.V.; Durieu-Trautmann, O.; Strosberg, A.D. Structure of the gene for human  $\beta_2$ -adrenergic receptor: expression and promoter characterization. *Proc. Natl. Acad. Sci. U. S. A.* **1987**, *84*, 6995-6999.
42. Emorine, L.J.; Marullo, S.; Briend-Sutren, M.M.; Patey, G.; Tate, K.; Delavie-Klutcho, C.; Strosberg, A.D. Molecular characterization of the human  $\beta_3$ -adrenergic receptor. *Science* **1989**, *245*, 1118-1121.
43. Sunahara, R.K.; Niznik, H.B.; Weiner, D.M.; Stormann, T.M.; Brann, M.R.; Kennedy, J.L.; Gelernter, J.E.; Rozmahel, R.; Yang, Y.L.; Israel, Y.; Seeman, P.; O'Dowd, B.F. Human dopamine D<sub>1</sub> receptor encoded by an intronless gene on chromosome 5. *Nature* **1990**, *347*, 80-83.
44. Sunahara, R.K.; Guan, H.C.; O'Dowd, B.F.; Seeman, P.; Laurier, L.G.; Ng, G.; George, S.R.; Torchia, J.; Van Tol, H.H.; Niznik, H.B. Cloning of the gene for a human dopamine D<sub>5</sub> receptor with higher affinity for dopamine than D<sub>1</sub>. *Nature* **1991**, *350*, 614-619.
45. Dearth, A.; Falardeau, P.; Shores, C.; Caron, M.G. D<sub>2</sub> dopamine receptors in the human retina: cloning of cDNA and localization of mRNA. *Cell. Mol. Neurobiol.* **1991**, *11*, 437-453.
46. Sokoloff, P.; Giros, B.; Martres, M.P.; Bouthenet, M.L.; Schwartz J.C. Molecular cloning and characterization of a novel dopamine receptor (D<sub>3</sub>) as a target for neuroleptics. *Nature* **1990**, *347*, 146-151.
47. Van Tol, H.H.; Bunzow, J.R.; Guan, H.C.; Sunahara, R.K.; Seeman, P.; Niznik, H.B.; Civelli, O. Cloning of the gene for a human dopamine D<sub>4</sub> receptor with high affinity for the antipsychotic clozapine. *Nature* **1991**, *350*, 610-614.
48. Fargin, A.; Raymond, J.R.; Lohse, M.J.; Kobilka, B.K.; Caron, M.G.; Lefkowitz, R.J. The genomic clone G-21 which resembles a  $\beta$ -adrenergic receptor sequence encodes the 5-HT<sub>1A</sub> receptor. *Nature* **1988**, *335*, 358-360.
49. Jin, H.; Oksenberg, D.; Ashkenazi, A.; Peroutka, S.J.; Duncan, A.M.; Rozmahel, R.; Yang, Y.; Mengod, G.; Palacios, J.M.; O'Dowd, B.F. Characterization of the human 5-hydroxytryptamine<sub>1B</sub> receptor. *J. Biol. Chem.* **1992**, *267*, 5735-5738.
50. Hamblin, M.W.; Metcalf, M.A. Primary structure and functional characterization of a human 5-HT<sub>1D</sub>-type serotonin receptor. *Mol. Pharmacol.* **1991**, *40*, 143-148.
51. Levy, F.O.; Gudermann, T.; Perez-Reyes, E.; Birnbaumer, M.; Kaumann, A.J.; Birnbaumer, L. Molecular cloning of a human serotonin receptor (S<sub>12</sub>) with a pharmacological profile resembling that of the 5-HT<sub>1D</sub> subtype. *J. Biol. Chem.* **1992**, *267*, 7553-7562.
52. Adham, N.; Kao, H.T.; Schecter, L.E.; Bard, J.; Olsen, M.; Urquhart, D.; Durkin, M.; Hartig, P.R.; Weinshank, R.L.; Branchek, T.A. Cloning of another human serotonin receptor (5-HT<sub>1F</sub>): a fifth 5-HT<sub>1</sub> receptor subtype coupled to the inhibition of adenylate cyclase. *Proc. Natl. Acad. Sci. U. S. A.* **1993**, *90*, 408-412.
53. Saltzman, A.G.; Morse, B.; Whitman, M.M.; Ivanshchenko, Y.; Jaye, M.; Felder, S. Cloning of the human serotonin 5-HT<sub>2</sub> and 5-HT<sub>1C</sub> receptor subtypes. *Biochem. Biophys. Res. Commun.* **1991**, *181*, 1469-1478.
54. Schmuck, K.; Ullmer, C.; Engels, P.; Lubbert, H. Cloning and functional characterization of the human 5-HT<sub>2B</sub> serotonin receptor. *FEBS Lett.* **1994**, *342*, 85-90.
55. Lovenberg, T.W.; Baron, B.M.; de Lecea, L.; Miller, J.D.; Prosser, R.A.; Rea, M.A.; Foye, P.E.; Racke, M.; Slone, A.L.; Siegel, B.W.; Danielson, P.A.; Sutcliffe, J.G.; Erlander M.G. A novel adenylyl cyclase-activating serotonin receptor (5-HT<sub>7</sub>) implicated in the regulation of mammalian circadian rhythms. *Neuron* **1993**, *11*, 449-458.
56. Nathans, J.; Hogness, D.S. Isolation and nucleotide sequence of the gene encoding human rhodopsin. *Proc. Natl. Acad. Sci. U. S. A.* **1984**, *81*, 4851-4855.
